# Supplementary material for: Enhancing the photocatalytic efficiency of two-dimensional aluminum nitride materials through strategic rare earth doping
Source: Royal Society of Chemistry journal article supplement (doi:10.1039/d3cp03661h), 2023-01-01
Supplement: d3cp03661h1.pdf [file d3cp03661h1.pdf]

## Electronic Supplementary Information

### Enhancing photocatalytic efficiency of two-dimensional aluminum nitride materials through strategic rare earth doping

Weiyin Yan<sup>#a,b,d</sup>, Yayu Yan<sup>#a,b,d</sup>, Zirui Wang<sup>a,c,d</sup>, Qiao-Hong Li<sup>\*a,d</sup>, and Jian Zhang<sup>\*a,d</sup>

*<sup>a</sup> State Key Laboratory of Structural Chemistry, Fujian Institute of Research on the Structure of Matter, Chinese Academy of Sciences, Fuzhou, Fujian 350002, China*

*<sup>b</sup> College of Chemistry, Fuzhou University, Fuzhou, Fujian 350108, China*

*<sup>c</sup> School of Physical Science and Technology, Shanghai Tech University, Shanghai 201210, China*

*<sup>d</sup> Fujian College, University of Chinese Academy of Sciences, Fuzhou 350002, China*

*\*Corresponding authors: lqh2382@fjirsm.ac.cn; zhj@fjirsm.ac.cn*

Table S1 The structures of doping systems.

| Al <sub>25</sub> N <sub>25</sub> |                     |                     | Al <sub>24</sub> N <sub>24</sub> |                     |                     |
|----------------------------------|---------------------|---------------------|----------------------------------|---------------------|---------------------|
| 1.00000000000000                 |                     |                     | 1.00000000000000                 |                     |                     |
| 15.6429996490000001              | 0.0000000000000000  | 0.0000000000000000  | 15.3509274969442764              | 0.0004301380355467  | 0.0000000000000000  |
| -7.8214998245000000              | 13.5472350875000007 | 0.0000000000000000  | -7.6750782299719527              | 13.6509676965208406 | 0.0000000000000000  |
| 0.0000000000000000               | 0.0000000000000000  | 16.0000000000000000 | 0.0000000000000000               | 0.0000000000000000  | 16.0000000000000000 |
| Al                               | N                   |                     | Al                               | N                   |                     |
| 25                               | 25                  |                     | 24                               | 24                  |                     |
| Direct                           |                     |                     | Direct                           |                     |                     |
| 0.0666625997390143               | 0.1333374032609853  | 0.1469102488972139  | 0.0719887070434726               | 0.1369814970201687  | 0.1469243295015535  |
| 0.2666625877390161               | 0.1333374032609853  | 0.1469102488972139  | 0.2679301949245360               | 0.1271299907764459  | 0.1469192519748289  |
| 0.4666626057390134               | 0.1333374032609853  | 0.1469102488972139  | 0.4592482646929667               | 0.1271644884980828  | 0.1469255523119739  |
| 0.6666626227390140               | 0.1333374032609853  | 0.1469102488972139  | 0.6650526957702748               | 0.1369919486542300  | 0.1469241215779863  |
| 0.8666626107390158               | 0.1333374032609853  | 0.1469102488972139  | 0.8688109572353416               | 0.1375706155380753  | 0.1468583942444446  |
| 0.0666625997390143               | 0.3333374062609848  | 0.1469102488972139  | 0.0707518489975523               | 0.3344658924505967  | 0.1468497578401493  |
| 0.2666625877390161               | 0.3333374062609848  | 0.1469102488972139  | 0.2793456204038036               | 0.3365436047286482  | 0.1468725996164818  |
| 0.4666626057390134               | 0.3333374062609848  | 0.1469102488972139  | 0.6571064315139078               | 0.3365073210362647  | 0.1468646567204986  |
| 0.6666626227390140               | 0.3333374062609848  | 0.1469102488972139  | 0.8636581376021101               | 0.3344361325992622  | 0.1468483338837455  |
| 0.8666626107390158               | 0.3333374062609848  | 0.1469102488972139  | 0.0651461607420633               | 0.5302968931078422  | 0.1469141011548732  |
| 0.0666625997390143               | 0.5333374242609821  | 0.1469102488972139  | 0.2727256581313397               | 0.5321318978409533  | 0.1468730990356701  |
| 0.2666625877390161               | 0.5333374242609821  | 0.1469102488972139  | 0.4815671199443251               | 0.5389159125314881  | 0.1469076939787399  |
| 0.4666626057390134               | 0.5333374242609821  | 0.1469102488972139  | 0.6573377689799058               | 0.5388809311102977  | 0.1469075825759683  |
| 0.6666626227390140               | 0.5333374242609821  | 0.1469102488972139  | 0.8593702912726161               | 0.5321075996805232  | 0.1468663272525347  |
| 0.8666626107390158               | 0.5333374242609821  | 0.1469102488972139  | 0.0632385394763549               | 0.7285344609152998  | 0.1469151575499812  |
| 0.0666625997390143               | 0.7333374122609839  | 0.1469102488972139  | 0.2652720391331686               | 0.7285272785794262  | 0.1469127564334708  |
| 0.2666625877390161               | 0.7333374122609839  | 0.1469102488972139  | 0.4683941568460848               | 0.7360462684111506  | 0.1468844391699832  |
| 0.4666626057390134               | 0.7333374122609839  | 0.1469102488972139  | 0.6705523739945828               | 0.7410666187451919  | 0.1468730671701769  |
| 0.6666626227390140               | 0.7333374122609839  | 0.1469102488972139  | 0.8676361166085963               | 0.7360431456815523  | 0.1468838506284889  |
| 0.8666626107390158               | 0.7333374122609839  | 0.1469102488972139  | 0.0671701202624982               | 0.9325566446320380  | 0.1468926854864639  |
| 0.0666625997390143               | 0.9333374002609858  | 0.1469102488972139  | 0.2622270954579772               | 0.9244385219746374  | 0.1468935602054476  |
| 0.2666625877390161               | 0.9333374002609858  | 0.1469102488972139  | 0.4653938822889815               | 0.9325953872568404  | 0.1468900370331463  |
| 0.4666626057390134               | 0.9333374002609858  | 0.1469102488972139  | 0.6686305460420403               | 0.9390012322510389  | 0.1468748707715488  |
| 0.6666626227390140               | 0.9333374002609858  | 0.1469102488972139  | 0.8703940347026639               | 0.9390131438041323  | 0.1468778734912043  |
| 0.8666626107390158               | 0.9333374002609858  | 0.1469102488972139  | 0.1333309494294599               | 0.0645887009492195  | 0.1468782369403767  |
| 0.1333374032609853               | 0.0666625997390143  | 0.1468497531027923  | 0.3272905693042391               | 0.0545509703363253  | 0.1469323959701757  |
| 0.3333374062609848               | 0.0666625997390143  | 0.1468497531027923  | 0.5313478167769009               | 0.0646277114524485  | 0.1468737979112927  |
| 0.5333374242609821               | 0.0666625997390143  | 0.1468497531027923  | 0.7343078559100810               | 0.0713896134481882  | 0.1468721808410987  |
| 0.7333374122609839               | 0.0666625997390143  | 0.1468497531027923  | 0.9371343407387047               | 0.0713801247964492  | 0.1468711289021732  |
| 0.9333374002609858               | 0.0666625997390143  | 0.1468497531027923  | 0.1420145178557276               | 0.2697608317603024  | 0.1468734342311437  |
| 0.1333374032609853               | 0.2666625877390161  | 0.1468497531027923  | 0.3340022623299455               | 0.2577254736652299  | 0.1468260253664097  |
| 0.3333374062609848               | 0.2666625877390161  | 0.1468497531027923  | 0.5236080527880466               | 0.2578075055060863  | 0.1468262755535646  |
| 0.5333374242609821               | 0.2666625877390161  | 0.1468497531027923  | 0.7276946391178598               | 0.2697516449048813  | 0.1468697464393585  |

|                    |                    |                    |                    |                    |                    |
|--------------------|--------------------|--------------------|--------------------|--------------------|--------------------|
| 0.7333374122609839 | 0.2666625877390161 | 0.1468497531027923 | 0.9349740061932542 | 0.2699546166917946 | 0.1468613681622531 |
| 0.9333374002609858 | 0.2666625877390161 | 0.1468497531027923 | 0.1370034677363424 | 0.4664845948803272 | 0.1468824240806237 |
| 0.1333374032609853 | 0.4666626057390134 | 0.1468497531027923 | 0.3458717793978848 | 0.4686584177822619 | 0.1468848797706902 |
| 0.3333374062609848 | 0.4666626057390134 | 0.1468497531027923 | 0.7227923747961283 | 0.4686536431327492 | 0.1468755527167340 |
| 0.5333374242609821 | 0.4666626057390134 | 0.1468497531027923 | 0.9294751921439086 | 0.4664672363149675 | 0.1468790791493506 |
| 0.7333374122609839 | 0.4666626057390134 | 0.1468497531027923 | 0.1310373269485611 | 0.6620759020303945 | 0.1468895070078246 |
| 0.9333374002609858 | 0.4666626057390134 | 0.1468497531027923 | 0.3346699316676856 | 0.6638754356111881 | 0.1468657891713410 |
| 0.1333374032609853 | 0.6666626227390140 | 0.1468497531027923 | 0.5368866628216786 | 0.6707649619051151 | 0.1468559695841888 |
| 0.3333374062609848 | 0.6666626227390140 | 0.1468497531027923 | 0.7338750759502508 | 0.6707079800741200 | 0.1468530264450768 |
| 0.5333374242609821 | 0.6666626227390140 | 0.1468497531027923 | 0.9291916826128119 | 0.6638523731243243 | 0.1468638281774518 |
| 0.7333374122609839 | 0.6666626227390140 | 0.1468497531027923 | 0.1286181517092057 | 0.8601904838280661 | 0.1468883386980597 |
| 0.9333374002609858 | 0.6666626227390140 | 0.1468497531027923 | 0.3315996681306887 | 0.8601814217233301 | 0.1468807217363782 |
| 0.1333374032609853 | 0.8666626107390158 | 0.1468497531027923 | 0.5346625673885981 | 0.8679884626090998 | 0.1468581567701731 |
| 0.3333374062609848 | 0.8666626107390158 | 0.1468497531027923 | 0.7363442258702459 | 0.8726389378012785 | 0.1468654720710033 |
| 0.5333374242609821 | 0.8666626107390158 | 0.1468497531027923 | 0.9333182253145818 | 0.8679756208476154 | 0.1468586126938745 |
| 0.7333374122609839 | 0.8666626107390158 | 0.1468497531027923 |                    |                    |                    |
| 0.9333374002609858 | 0.8666626107390158 | 0.1468497531027923 |                    |                    |                    |

| Al <sub>24</sub> N <sub>24</sub> Dy |                     |                     | Al <sub>24</sub> N <sub>23</sub> DyC |                     |                     |
|-------------------------------------|---------------------|---------------------|--------------------------------------|---------------------|---------------------|
| 1.0000000000000000                  |                     |                     | 1.0000000000000000                   |                     |                     |
| 15.5819931481207270                 | -0.0148948286717782 | 0.0000000000000000  | 15.5272802273841712                  | -0.0495264585898367 | 0.0000000000000000  |
| -7.8037946130653930                 | 13.5316016223718485 | 0.0000000000000000  | -7.8064955888873051                  | 13.5932927150323959 | 0.0000000000000000  |
| 0.0000000000000000                  | 0.0000000000000000  | 16.0000000000000000 | 0.0000000000000000                   | 0.0000000000000000  | 16.0000000000000000 |
| Al                                  | N                   | Dy                  | Al                                   | N                   | C                   |
| 24                                  | 24                  | 1                   | 24                                   | 23                  | 1                   |
|                                     |                     |                     | Dy                                   |                     |                     |
|                                     |                     |                     | 1                                    |                     |                     |
| Direct                              |                     |                     | Direct                               |                     |                     |
| 0.0679527464614976                  | 0.1350281779875231  | 0.1391533226139000  | 0.0714064774712136                   | 0.1370550619959546  | 0.1387058491358844  |
| 0.2659202276233457                  | 0.1334314264381559  | 0.1532378019439609  | 0.2697677855976807                   | 0.1342672903064429  | 0.1435735842570130  |
| 0.4677503626512878                  | 0.1332434377289362  | 0.1559980276065517  | 0.4661842901696894                   | 0.1315381548245165  | 0.1614620121303835  |
| 0.6672798229365670                  | 0.1348109282584506  | 0.1404286361818098  | 0.6668331256109319                   | 0.1349034329673446  | 0.1435810540354829  |
| 0.8678702635641561                  | 0.1353426385353741  | 0.1385562529579975  | 0.8691044157553434                   | 0.1364014710733696  | 0.1396800314029244  |
| 0.0679721383807435                  | 0.3354495010559033  | 0.1397064521712876  | 0.0681677254335362                   | 0.3354754137776961  | 0.1420980558870892  |
| 0.2663641006753025                  | 0.3345233619031043  | 0.1545798482100470  | 0.2702957000477744                   | 0.3358629326187483  | 0.1472720237629450  |
| 0.6677760769384650                  | 0.3333738829398751  | 0.1538751745380373  | 0.6651068489402230                   | 0.3309698688919623  | 0.1643764292778331  |
| 0.8680055337003552                  | 0.3352380577931720  | 0.1403838054581677  | 0.8666216327928086                   | 0.3347176960962165  | 0.1431757699131868  |
| 0.0673034498725727                  | 0.5345576266823218  | 0.1450188879285426  | 0.0648864589132990                   | 0.5334732249322781  | 0.1481492193450030  |
| 0.2692115761376276                  | 0.5343156851259078  | 0.1467257866640470  | 0.2681563930379492                   | 0.5351872850931032  | 0.1486052939394466  |
| 0.4717283508997544                  | 0.5391394598054470  | 0.1745147943237793  | 0.4721673622509844                   | 0.5373034301860654  | 0.1436124092462582  |
| 0.6599944526318871                  | 0.5323364649674754  | 0.1362113462915573  | 0.6611320500918694                   | 0.5372348563460835  | 0.1518625990602666  |
| 0.8648729081826192                  | 0.5339033661386486  | 0.1469529908382248  | 0.8609947106037502                   | 0.5323258146133844  | 0.1496463979365697  |
| 0.0661604513073863                  | 0.7337870164455665  | 0.1430609145882827  | 0.0644805861436600                   | 0.7323682542376422  | 0.1439982870024180  |
| 0.2669336446916392                  | 0.7339296324813509  | 0.1451266199279374  | 0.2654932005438900                   | 0.7328954872965204  | 0.1445249237385516  |

|                    |                    |                    |                    |                    |                    |
|--------------------|--------------------|--------------------|--------------------|--------------------|--------------------|
| 0.4675914549052014 | 0.7353682793827321 | 0.1458219388897220 | 0.4670011865216982 | 0.7353265855871599 | 0.1377323246223696 |
| 0.6676192727116189 | 0.7356068320757400 | 0.1424223959167311 | 0.6689990131159853 | 0.7386201175039409 | 0.1385430094852938 |
| 0.8654100915848165 | 0.7334053200130993 | 0.1373985052565120 | 0.8669563762285479 | 0.7353986853725011 | 0.1428993900593522 |
| 0.0663101685309313 | 0.9335779066350532 | 0.1383170003892209 | 0.0676518786922296 | 0.9345821440323976 | 0.1385064401639666 |
| 0.2669334108580367 | 0.9343220828651023 | 0.1443402039613821 | 0.2657301218582641 | 0.9318234748840897 | 0.1431499120405012 |
| 0.4669499206239527 | 0.9341029830476633 | 0.1407106276304725 | 0.4663475802793969 | 0.9336835201159167 | 0.1397072518522682 |
| 0.6675928806989336 | 0.9351672984520526 | 0.1411091713226630 | 0.6680330653478388 | 0.9367676166577273 | 0.1378628749106043 |
| 0.8677215954185240 | 0.9351641239154712 | 0.138400377324805  | 0.8697215550009725 | 0.9376607490162233 | 0.1402585187027054 |
| 0.1332431167793447 | 0.0668673501805176 | 0.1398281033111149 | 0.1344679914379010 | 0.0667176911977314 | 0.1368193940947116 |
| 0.3338760567863036 | 0.0677418230616379 | 0.1518883787868118 | 0.3328952881689401 | 0.0634382367715527 | 0.1508709944898770 |
| 0.5337137827290371 | 0.0670876116312508 | 0.1411179457466120 | 0.5331385432889512 | 0.0659844864571096 | 0.1450442657816274 |
| 0.7343123124290789 | 0.0684798313223251 | 0.1401717276388696 | 0.7348411425673330 | 0.0694674667806907 | 0.1396132679856293 |
| 0.9344335407783055 | 0.0684205473654555 | 0.1380712157679623 | 0.9364506382809999 | 0.0702824667744661 | 0.1403693051278312 |
| 0.1340724655983830 | 0.2684028724572999 | 0.1404033284666786 | 0.1354419928531718 | 0.2702516554711417 | 0.1397460611418336 |
| 0.3283641137880122 | 0.2647476144928834 | 0.1729052194390349 | 0.5368127790871386 | 0.2591929392173145 | 0.1933275703640768 |
| 0.5377814933382397 | 0.2636282000014649 | 0.1782941914881571 | 0.7331701931544696 | 0.2680119679720434 | 0.1451248474682720 |
| 0.7347650734506838 | 0.2681919762362958 | 0.1399055376310964 | 0.9341780791639366 | 0.2693514482554972 | 0.1394173967222024 |
| 0.9346583707027577 | 0.2687058645588579 | 0.1377286757517807 | 0.1336875650882819 | 0.4684599510634139 | 0.1479718963618158 |
| 0.1351663392050972 | 0.4686391766282125 | 0.1430761347436411 | 0.3382696076641323 | 0.4711042580438142 | 0.1511238521338623 |
| 0.3374290329435773 | 0.4682368795669191 | 0.1544787916881356 | 0.7240586332692344 | 0.4654128187155995 | 0.1562471084603776 |
| 0.7298277721413404 | 0.4673828154417610 | 0.1512163518501209 | 0.9299944507748034 | 0.4675913848403803 | 0.1479391575464527 |
| 0.9332139843094216 | 0.4683807847994095 | 0.1452301836885254 | 0.1314358277758041 | 0.6661338572126809 | 0.1477653492633312 |
| 0.133352540429416  | 0.6676772749694989 | 0.1463683359246960 | 0.3336277319451975 | 0.6676610119897903 | 0.1448139101947150 |
| 0.3341153626080600 | 0.6676423724516085 | 0.1462500727084635 | 0.5351901232554952 | 0.6693579307487324 | 0.1350937202156545 |
| 0.5350444174460962 | 0.6700365002989725 | 0.1523668095691058 | 0.7323872769081524 | 0.6688285568726103 | 0.1429744982277604 |
| 0.7315287864673964 | 0.6664384900333477 | 0.1340244659177280 | 0.9297236285628899 | 0.6652003895483448 | 0.1457837604354635 |
| 0.9323334095912712 | 0.6670788356276145 | 0.1425372430049853 | 0.1313953704723860 | 0.8648736338002756 | 0.1393726242258523 |
| 0.1333248566314689 | 0.8672274088350829 | 0.1405346943649166 | 0.3324835682897778 | 0.8651966741288051 | 0.1413508599879697 |
| 0.3334100699141689 | 0.8674063254079302 | 0.1431833892516748 | 0.5340335451944341 | 0.8677969934965070 | 0.1355058851982254 |
| 0.5341572729401182 | 0.8682614563176081 | 0.1405826687939924 | 0.7354539648635366 | 0.8706938062323852 | 0.1393038925046061 |
| 0.7345101794348272 | 0.8687698266943014 | 0.1412654558986995 | 0.9331480639913726 | 0.8677704862301601 | 0.1402525211188516 |
| 0.9327314793681616 | 0.8668879819166080 | 0.1367743313837974 | 0.3445584592522045 | 0.2720881358699845 | 0.1513452920413038 |
| 0.4740966565886406 | 0.3486947970289593 | 0.2188759158400636 | 0.4706060962398736 | 0.3434492918816293 | 0.228968959993589  |

| Al <sub>24</sub> N <sub>22</sub> DyC <sub>2</sub> |                     |                     | Al <sub>24</sub> N <sub>23</sub> C |                     |                     |
|---------------------------------------------------|---------------------|---------------------|------------------------------------|---------------------|---------------------|
| 1.0000000000000000                                |                     |                     | 1.0000000000000000                 |                     |                     |
| 15.5957778890232657                               | -0.0003669493407181 | 0.0000000000000000  | 15.0705605980628121                | -0.0129723062779636 | 0.0000000000000000  |
| -7.7982041808563309                               | 13.7303035640334397 | 0.0000000000000000  | -7.5447661668192998                | 13.6942744428920928 | 0.0000000000000000  |
| 0.0000000000000000                                | 0.0000000000000000  | 16.0000000000000000 | 0.0000000000000000                 | 0.0000000000000000  | 16.0000000000000000 |
| Al                                                | N                   | C                   | Al                                 | N                   | C                   |
| 24                                                | 22                  | 2                   | 24                                 | 23                  | 1                   |
| Dy                                                |                     |                     |                                    |                     |                     |
| 1                                                 |                     |                     |                                    |                     |                     |
| Direct                                            |                     |                     | Direct                             |                     |                     |

|                    |                    |                    |                    |                    |                    |
|--------------------|--------------------|--------------------|--------------------|--------------------|--------------------|
| 0.0696991231338061 | 0.1358138071106933 | 0.1468409871047981 | 0.0783159264268802 | 0.1400357786966677 | 0.1467861406854561 |
| 0.2629425665720327 | 0.1235768628374273 | 0.1467092115327695 | 0.2717348761878483 | 0.1266859969691994 | 0.1467843303198479 |
| 0.4603204320222954 | 0.1235315191034507 | 0.1467109536741474 | 0.4543374167398489 | 0.1281600109224100 | 0.1468883951223477 |
| 0.6658453863067445 | 0.1358658773101531 | 0.1468583873621344 | 0.6623051005562333 | 0.1395344035460541 | 0.1468375077942917 |
| 0.8680987043715075 | 0.1365744236415691 | 0.1468502039367635 | 0.8707839227490970 | 0.1407524836434856 | 0.1468750644971928 |
| 0.0667488715582485 | 0.3351722160053215 | 0.1468228075547111 | 0.0777200269049270 | 0.3317464438020180 | 0.1468641777523596 |
| 0.2657617419532079 | 0.3375299388249406 | 0.1469074119801910 | 0.3048345631995606 | 0.3365952436998897 | 0.1468448675002026 |
| 0.6713793891712700 | 0.3375135346392454 | 0.1469194513874364 | 0.6341769322680119 | 0.3338628814401365 | 0.1468626711628756 |
| 0.8680808192932914 | 0.3352046311486621 | 0.1468334372856899 | 0.8558782944647497 | 0.3316176683773996 | 0.1469078037363582 |
| 0.0665735968755282 | 0.5334443096669985 | 0.1467841705316622 | 0.0615189800729734 | 0.5243333259249940 | 0.1468894290099714 |
| 0.2680306655892293 | 0.5355648189520414 | 0.1469091253453671 | 0.2747673828219342 | 0.5290355119494520 | 0.1469683910981269 |
| 0.4719680039105023 | 0.5442301492508997 | 0.1465276494735217 | 0.4863617346913086 | 0.5446457379644359 | 0.1469589335887891 |
| 0.6719720682865560 | 0.5442592284029307 | 0.1465485354698276 | 0.6548343785940542 | 0.5434384263436642 | 0.1468736492937017 |
| 0.8672035125684439 | 0.5355179303192427 | 0.1469242995299828 | 0.8513885795485272 | 0.5274197694237540 | 0.1468887688190965 |
| 0.0654759913577089 | 0.7315646565520780 | 0.1468632601122573 | 0.0591434236437465 | 0.7228547236438226 | 0.1469124529109672 |
| 0.2658029411322954 | 0.7315765072355455 | 0.1468573258279939 | 0.2625665245414912 | 0.7235356139791501 | 0.1468935666899905 |
| 0.4675809820204406 | 0.7373513007895521 | 0.1468595895005171 | 0.4683356018028952 | 0.7392969879610702 | 0.1468705060167162 |
| 0.6709034572508629 | 0.7420934382114651 | 0.1467776752456320 | 0.6731322243200422 | 0.7468607624499591 | 0.1468872730060182 |
| 0.8695358714689047 | 0.7372975582439346 | 0.1468751793944553 | 0.8689127094957616 | 0.7378983492652610 | 0.1468958621050640 |
| 0.0655962626753107 | 0.9316573170071519 | 0.1468970701115679 | 0.0693687008874625 | 0.9327800709791781 | 0.1468204268157613 |
| 0.2628969313388274 | 0.9260893263115749 | 0.1470098031531768 | 0.2587599199811597 | 0.9178728459484181 | 0.1470037853385311 |
| 0.4658403119031631 | 0.9316824840027470 | 0.1469104618099023 | 0.4632939103424907 | 0.9344996622594958 | 0.1468906049085705 |
| 0.6684860288882595 | 0.9386505983446776 | 0.1469197665538437 | 0.6695923633597963 | 0.9436371324832636 | 0.1468924741840523 |
| 0.8698948891154570 | 0.9386111385284702 | 0.1469172560755664 | 0.8742784979714009 | 0.9435971900117870 | 0.1469009668184240 |
| 0.1291719191240843 | 0.0622260580082981 | 0.1468140618670320 | 0.1364695829313886 | 0.0644011526776830 | 0.1467223887337143 |
| 0.3275280612658907 | 0.0554005993549638 | 0.1471320227967273 | 0.3235052092896509 | 0.0465614427710317 | 0.1470152685479912 |
| 0.5327841897872485 | 0.0622321821495837 | 0.1468398834862155 | 0.5280001516867866 | 0.0668867197991940 | 0.1468434388313932 |
| 0.7345076973046440 | 0.0703842413284399 | 0.1468743707529634 | 0.7346116370112447 | 0.0758954080567304 | 0.1468866114594942 |
| 0.9355291402381182 | 0.0703948532310945 | 0.1468665056654888 | 0.9416842993122366 | 0.0758844044559697 | 0.1468735591536896 |
| 0.1323033986852159 | 0.2684863993948040 | 0.1468726187450888 | 0.1594260912130604 | 0.2718201367879792 | 0.1468264141916219 |
| 0.7358590601996856 | 0.2685331461228795 | 0.1469083759095685 | 0.4851734736700177 | 0.2611331220707914 | 0.1467748291837771 |
| 0.9341591771436979 | 0.2687076179148065 | 0.1468036265572009 | 0.7139425452680624 | 0.2711951803139372 | 0.1468639561411674 |
| 0.1345603329194302 | 0.4676777598498096 | 0.1468609420568251 | 0.9368016572768429 | 0.2724343116822636 | 0.1468604607335324 |
| 0.3385688717494429 | 0.4715166867624931 | 0.1469252584804709 | 0.1375403836415820 | 0.4629311711622465 | 0.1469202429453175 |
| 0.7326199363933270 | 0.4714987722671726 | 0.1469811859728994 | 0.3509035669613874 | 0.4673871522976876 | 0.1469705228435606 |
| 0.9328090067714642 | 0.4676745904240204 | 0.1468371269755176 | 0.7122799148947704 | 0.4649762672197995 | 0.1468894949241349 |
| 0.1324277411402247 | 0.6651620236584284 | 0.1467946747603218 | 0.9237248943899866 | 0.4626912382081563 | 0.1468876252737419 |
| 0.3344767805933842 | 0.6669456510625824 | 0.1468744286744889 | 0.1272514763879308 | 0.6558858401057659 | 0.1468847036367291 |
| 0.5377833221689180 | 0.6741272980803765 | 0.1467344093821749 | 0.3341971074132960 | 0.6604926407524836 | 0.1469183869111291 |
| 0.7360948181964551 | 0.6741288046625638 | 0.1467591936121405 | 0.5387058802319106 | 0.6755434167027925 | 0.1469053369418043 |
| 0.9321803249313102 | 0.6668804933633241 | 0.1468881820899749 | 0.7347337677849387 | 0.6741154587709296 | 0.1468756616905458 |
| 0.1298257778171057 | 0.8624118706032360 | 0.1469072523506572 | 0.9239529011323225 | 0.6589157568385373 | 0.1469036268124578 |
| 0.3323339849347027 | 0.8624427001609479 | 0.1469137654392504 | 0.1244071477868823 | 0.8539921505534227 | 0.1469461608010061 |
| 0.5351236789826729 | 0.8679734280428821 | 0.1469337032308915 | 0.3295338654256580 | 0.8546022455390504 | 0.1469365486824574 |

|                     |                     |                     |                    |                    |                    |
|---------------------|---------------------|---------------------|--------------------|--------------------|--------------------|
| 0.7363043440363212  | 0.8729051346201085  | 0.1469551326778448  | 0.5347502898084106 | 0.8711769415423338 | 0.1468594900969735 |
| 0.9326143125484354  | 0.8679524791625548  | 0.1469405132148222  | 0.7390638417135169 | 0.8781936297053963 | 0.1469072000406460 |
| 0.3246095983681584  | 0.2593829386782159  | 0.1462327294397876  | 0.9345925451745913 | 0.8693918440038294 | 0.146845533868406  |
| 0.5343474366679047  | 0.2593491811081662  | 0.1461173090410653  | 0.3884058830212781 | 0.2627954392969721 | 0.1467245908615387 |
| 0.4775286412682179  | 0.3553916255474229  | 0.1513287588666460  |                    |                    |                    |
| $Al_{24}N_{22}C_2$  |                     |                     |                    |                    |                    |
| 1.00000000000000    |                     |                     |                    |                    |                    |
| 15.1092630627754243 | 0.0002974167644580  | 0.0000000000000000  |                    |                    |                    |
| -7.5544133388370813 | 13.7314112002227002 | 0.0000000000000000  |                    |                    |                    |
| 0.0000000000000000  | 0.0000000000000000  | 16.0000000000000000 |                    |                    |                    |
| Al                  | N                   | C                   |                    |                    |                    |
| 24                  | 22                  | 2                   |                    |                    |                    |
| Direct              |                     |                     |                    |                    |                    |
| 0.0772151586872350  | 0.1393859043971559  | 0.1468574792674078  |                    |                    |                    |
| 0.2712617146547387  | 0.1249224735555025  | 0.1467818118133447  |                    |                    |                    |
| 0.4536665685370411  | 0.1249245809594744  | 0.1467781240399324  |                    |                    |                    |
| 0.6621778770626566  | 0.1393877721863985  | 0.1468581111987638  |                    |                    |                    |
| 0.8700326933666955  | 0.1400595282680879  | 0.1468849098631521  |                    |                    |                    |
| 0.0758297062348483  | 0.3320406983099599  | 0.1469101536205874  |                    |                    |                    |
| 0.2995330050609623  | 0.3380563835026945  | 0.1468207658664276  |                    |                    |                    |
| 0.6385210746335154  | 0.3380544331478570  | 0.1468178910582850  |                    |                    |                    |
| 0.8562111090404214  | 0.3320408942713718  | 0.1469110184688063  |                    |                    |                    |
| 0.0625129521191291  | 0.5250201136475749  | 0.1469121714058914  |                    |                    |                    |
| 0.2744241635242209  | 0.5300058250152421  | 0.1469330288783817  |                    |                    |                    |
| 0.4866746042726182  | 0.5434835032797728  | 0.1468967971460971  |                    |                    |                    |
| 0.6568097082888417  | 0.5434833852465178  | 0.1468973950115988  |                    |                    |                    |
| 0.8555842938147392  | 0.5300057542666018  | 0.1469338887351105  |                    |                    |                    |
| 0.0606270886419786  | 0.7237243466109301  | 0.1468959467924141  |                    |                    |                    |
| 0.2631043885762601  | 0.7237256761508859  | 0.1468978875829346  |                    |                    |                    |
| 0.4687876000380535  | 0.7380395006165280  | 0.1469408410860041  |                    |                    |                    |
| 0.6731849507381898  | 0.7463679901748786  | 0.1468944385853265  |                    |                    |                    |
| 0.8692564275907965  | 0.7380403345549442  | 0.1469422479979973  |                    |                    |                    |
| 0.0692225354615445  | 0.9325782303054215  | 0.1468722664439705  |                    |                    |                    |
| 0.2585458384798767  | 0.9170811362127448  | 0.1469738058059079  |                    |                    |                    |
| 0.4633618475670946  | 0.9325785553129333  | 0.1468752920717325  |                    |                    |                    |
| 0.6693802500121714  | 0.9430447196930246  | 0.1468768786213696  |                    |                    |                    |
| 0.8736674305496337  | 0.9430439755405038  | 0.1468762242907840  |                    |                    |                    |
| 0.1362722593367957  | 0.0644039006709437  | 0.1468324521226007  |                    |                    |                    |
| 0.3224159833991637  | 0.0448381212575658  | 0.1469245962842375  |                    |                    |                    |
| 0.5281279149021432  | 0.0644039671003613  | 0.1468338174361047  |                    |                    |                    |
| 0.7342289477496128  | 0.0751619709537019  | 0.1468961769770189  |                    |                    |                    |
| 0.9409319743763152  | 0.0751612867247951  | 0.1468960209112174  |                    |                    |                    |
| 0.1564027822129500  | 0.2714143169134426  | 0.1468595979652745  |                    |                    |                    |

|                    |                    |                    |
|--------------------|--------------------|--------------------|
| 0.7150097454142672 | 0.2714157805682809 | 0.1468591991764908 |
| 0.9357930707616877 | 0.2715871269507143 | 0.1469063404634061 |
| 0.1376400524491470 | 0.4629976168793958 | 0.1469198704522814 |
| 0.3504452731318452 | 0.4684557532997680 | 0.1469102020549068 |
| 0.7180078605991242 | 0.4684552428459158 | 0.1469114786210423 |
| 0.9253542161917300 | 0.4629988318465775 | 0.1469209312041918 |
| 0.1281354516666298 | 0.6562778931654596 | 0.1469041545715950 |
| 0.3346017279737039 | 0.6608139204325719 | 0.1469131153914632 |
| 0.5389775835617507 | 0.6742796437900164 | 0.1469048983385131 |
| 0.7352994884335233 | 0.6742833914794433 | 0.1469047164025172 |
| 0.9262044673921955 | 0.6608148176258529 | 0.1469132198083531 |
| 0.1247216474440644 | 0.8542454954139616 | 0.1469395535109540 |
| 0.3295173585196441 | 0.8542457673854764 | 0.1469423849220982 |
| 0.5348520945937588 | 0.8694625847508299 | 0.1468942849054817 |
| 0.7387604949873483 | 0.8775252789826530 | 0.1468344206365871 |
| 0.9346068496558537 | 0.8694636660340992 | 0.1468930645935629 |
| 0.3852393694065773 | 0.2640980278085600 | 0.1466437950019669 |
| 0.4788605038868606 | 0.2640999748925572 | 0.1466423805958856 |

Table S2 The different sites of hydrogen adsorption free energy.

| Adsorption site                                      | $\Delta G_{H^*}$ (eV) |
|------------------------------------------------------|-----------------------|
| Al <sub>24</sub> N <sub>22</sub> DyC <sub>2</sub> -1 | -                     |
| Al <sub>24</sub> N <sub>22</sub> DyC <sub>2</sub> -2 | -0.54                 |
| Al <sub>24</sub> N <sub>22</sub> DyC <sub>2</sub> -3 | -0.55                 |
| Al <sub>24</sub> N <sub>22</sub> DyC <sub>2</sub> -4 | -0.46                 |
| Al <sub>24</sub> N <sub>22</sub> DyC <sub>2</sub> -5 | -0.46                 |

Table S3 The different sites of intermediate energy(eV) and rate decision steps of free energy  $E_{(RDS)}$ (eV).

|                                                      | *        | OH*/eV | O*/eV | OOH*/eV | *+O <sub>2</sub> /eV | $E_{(RDS)}$ /eV |
|------------------------------------------------------|----------|--------|-------|---------|----------------------|-----------------|
| Al <sub>24</sub> N <sub>22</sub> DyC <sub>2</sub> -1 | U=0 V    | 0      | -1.55 | -4.53   | 1.76                 | 4.92            |
|                                                      | U=1.23 V | 0      | -2.78 | -6.99   | -1.93                | 0               |
| Al <sub>24</sub> N <sub>22</sub> DyC <sub>2</sub> -6 | U=0 V    | 0      | -1.43 | -4.55   | -4.61                | 4.92            |
|                                                      | U=1.23 V | 0      | -2.66 | -7.01   | -8.30                | 0               |
| Al <sub>24</sub> N <sub>22</sub> DyC <sub>2</sub> -7 | U=0 V    | 0      | -1.42 | -0.42   | -4.49                | 4.92            |
|                                                      | U=1.23 V | 0      | -2.65 | -2.88   | -8.18                | 0               |
| Al <sub>24</sub> N <sub>22</sub> DyC <sub>2</sub> -8 | U=0 V    | 0      | -1.08 | -1.33   | -3.59                | 4.92            |
|                                                      | U=1.23 V | 0      | -2.31 | -3.79   | -7.28                | 0               |
| Al <sub>24</sub> N <sub>22</sub> DyC <sub>2</sub> -9 | U=0 V    | 0      | -1.67 | -1.36   | -3.59                | 4.92            |
|                                                      | U=1.23 V | 0      | -2.90 | -3.82   | -7.28                | 0               |
